# Supplementary material for: COVID-19 symptoms and duration of direct antigen test positivity at a community testing and surveillance site, January 2021-2022
Source: bioRxiv or medRxiv preprint supplement (doi:10.1101/2022.05.19.22274968), 2022-05-23

**Supplementary Figure 1:** Prevalence of selected symptoms among symptomatic people testing positive and negative with the BinaxNOW rapid antigen test during pre-Delta (January 10-May 31, 2021), Delta (June 1, 2021- November 30, 2021), and Omicron period (December 1, 2021-January 30, 2021).

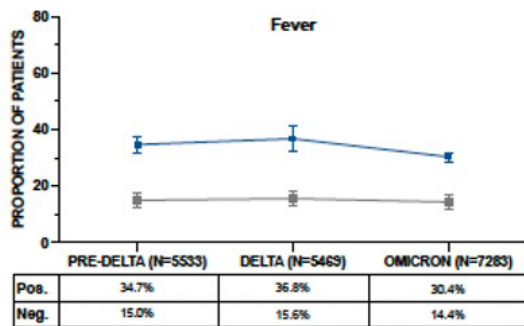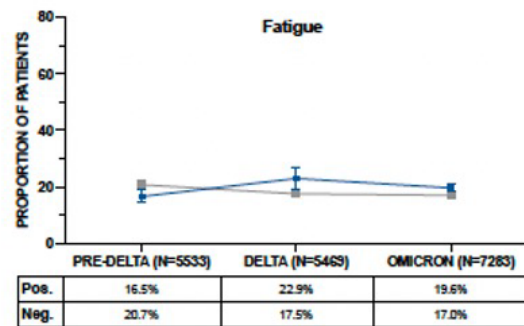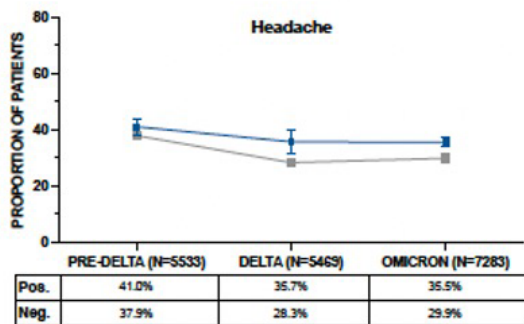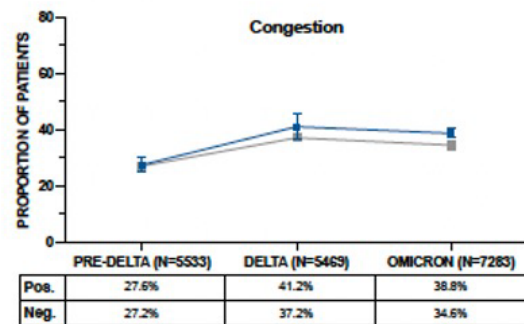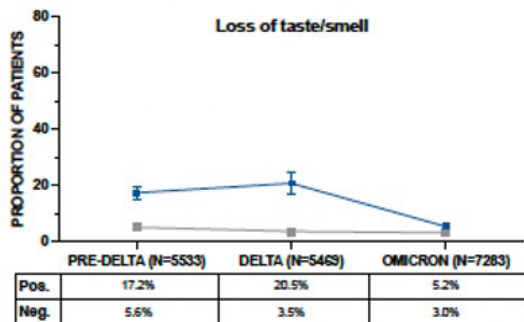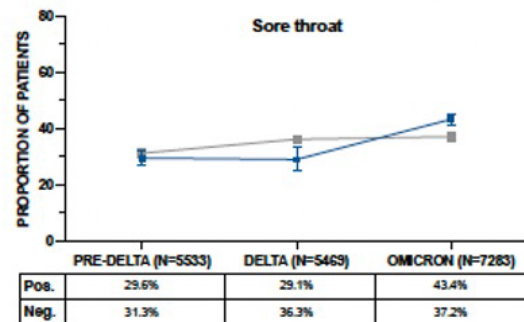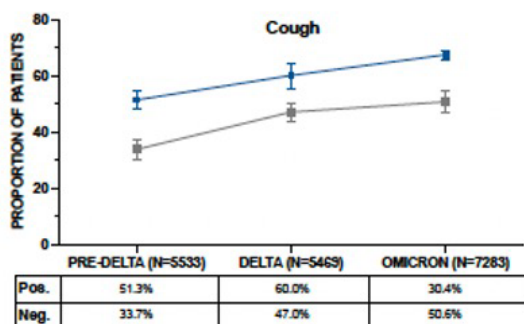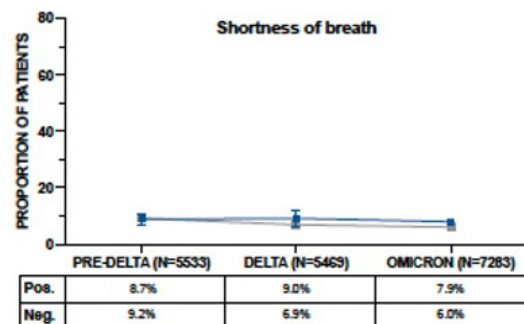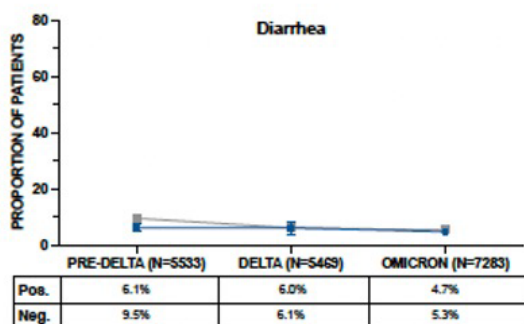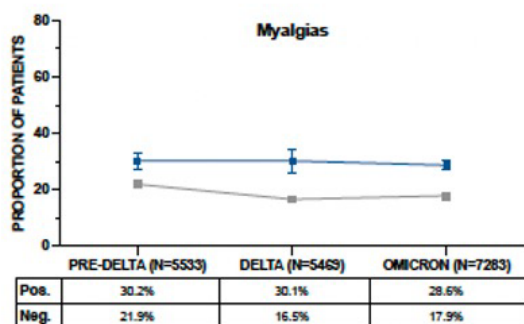

Supplement: Supplementary file [file media-1.pdf]
